# Supplementary material for: Revising the advanced access model pillars: a multimethod study
Source: PubMed Central journal article supplement — CMAJ Open. 2022 Sep 6;10(3):E799–806. doi: 10.9778/cmajo.20210314 (PMC9477472; doi:10.9778/cmajo.20210314), 2022-09-06
Supplement: open-2021-0314-1-at.pdf [file open-2021-0314-1-at.pdf]

## Appendix 1. Search strategy

| Search terms                                                | Results from Medline,<br>HealthSTAR, CINAHL and<br>PsycInfo |
|-------------------------------------------------------------|-------------------------------------------------------------|
| <b>I- Advanced Access</b>                                   |                                                             |
| 1 advanced access?.ti,ab.                                   | 5 836                                                       |
| 2 open-access?.ti,ab. OR open access?.ti,ab                 | 33 823                                                      |
| 3 timely access?.ti,ab.                                     | 8 343                                                       |
| 4 Same-day scheduling?.ti,ab. OR Same day scheduling?.ti,ab | 192                                                         |
| 5 Same-day access?.ti,ab. OR Same day access?.ti,ab.        | 1 661                                                       |
| 6 or/1-5 [^Advanced Access]                                 | 48 624                                                      |
| <b>II- Implementation or improvement</b>                    |                                                             |
| 7 implementation?.ti,ab.                                    | 764 547                                                     |
| 8 Improvement?.ti,ab.                                       | 1 889 420                                                   |
| 9 support?.ti,ab.                                           | 3 061 386                                                   |
| 10 guide*.ti,ab. OR guidance*.ti,ab.                        | 2 120 610                                                   |
| 11 or/7-10 [^process]                                       | 7 031 272                                                   |
| <b>III- Concepts of the AA model</b>                        |                                                             |
| 12 framework?.ti,ab.                                        | 856 391                                                     |
| 13 concept*.ti,ab.                                          | 1 476 508                                                   |
| 14 principle*.ti,ab                                         | 641 047                                                     |
| 15 or/12-14 [^Concept]                                      | 2 717 005                                                   |
| <b>IV- Combination of I, II and III</b>                     |                                                             |
| 16 11 OR 15                                                 | 9 055 182                                                   |
| 17 16 AND 6                                                 | 19 481                                                      |
| 18 Limit 17 to yr= 2001-2019                                | 13 719                                                      |
| 19 Remove of duplicates from 18                             | 9 939                                                       |
